# Supplementary material
Source: PubMed Central journal article supplement (PMC10203966)
Supplement: jama-e238674-s001.pdf [file jama-e238674-s001.pdf]

## Data Sharing Statement

Weiss. Type 1 Diabetes Incidence and Risk in Children With a Diagnosis of COVID-19. *JAMA*. Published May 22, 2023. doi:10.1001/jama.2023.8674

### Data

**Data available:** The deidentified data that underlie the results reported in this study can be shared. To request data, please contact the corresponding author. If the project is approved, it will be necessary to sign a data transfer agreement.
